# Supplementary material for: Meat consumption and risk of esophageal and gastric cancer in the Golestan Cohort Study, Iran
Source: PubMed Central journal article supplement (PMC9543688; doi:10.1002/ijc.34056), 2022-05-17
Supplement: IJC-151-1005-s001.pdf [file IJC-151-1005-s001.pdf]

**Supplementary Material for:**

**Meat consumption and risk of esophageal and gastric cancer in the Golestan Cohort Study, Iran**

Giulia Collatuzzo, Arash Etemadi, Masoud Sotoudeh, Arash Nikmanesh, Hossein Poustchi, Masoud Khoshnia, Akram Pourshams, Maryam Hashemian, Gholamreza Roshandel, Sanford M. Dawsey, Christian C. Abnet, Farin Kamangar, Paul Brennan, Paolo Boffetta, Reza Malekzadeh

**Table of contents:**

Supplementary Table 1: Variables included for adjustments in regression models for specific outcomes

Supplementary Table 2: Hazard ratios for types of meat consumption, stratified by sex

Supplementary Figure 1: Hazard ratio for increase in one quintile of meat intake by subtype of esophageal and gastric cancer

Supplementary Table 1: Variables included for adjustments in regression models for specific outcomes.

| Outcome       | Specific adjustments                                            |
|---------------|-----------------------------------------------------------------|
| EC            | Education, tea temperature                                      |
| ESCC          | Education, tea temperature, fruit, tobacco smoking, salt intake |
| EAC           | Education, fruit, vegetables, tobacco smoking, opium use        |
| GC            | Education, fruit                                                |
| Cardia GC     | Education, tea temperature, fruit                               |
| Non-cardia GC | Education, tea temperature, fruit, vegetables, opium use        |

Notes: The a-priori adjustments include sex, age, BMI, urban/rural residence, Turkmen ethnicity  
 Additional models also included (i) unprocessed red meat, processed meat, organ meat and white meat; (ii) total red meat and white meat  
 Substitution models also included variables for each single meat type and for total red meat  
 EC, esophageal cancer; GC, gastric cancer; BMI, Body Mass Index

Supplementary Table 2: Hazard ratios for types of meat consumption, stratified by sex

| Type of meat   | GC                 |                    | CGC                |                    | NCGC               |                    | EC                 |                    | ESCC               |                    | EAC                |                    |
|----------------|--------------------|--------------------|--------------------|--------------------|--------------------|--------------------|--------------------|--------------------|--------------------|--------------------|--------------------|--------------------|
|                | F                  | M                  | F                  | M                  | F                  | M                  | F                  | M                  | F                  | M                  | F                  | M                  |
| Red meat       | 1.06,<br>0.90-1.24 | 1.10,<br>1.00-1.21 | 1.13,<br>0.92-1.39 | 1.07,<br>0.94-1.21 | 0.99,<br>0.70-1.39 | 1.23,<br>1.02-1.48 | 1.13,<br>1.00-1.27 | 0.99,<br>0.88-1.11 | 1.11,<br>0.97-1.27 | 1.00,<br>0.89-1.14 | 1.13,<br>0.68-1.87 | 1.25,<br>0.77-2.05 |
| Processed meat | 0.97,<br>0.83-1.13 | 1.05,<br>0.97-1.15 | 0.90,<br>0.73-1.10 | 1.07,<br>0.96-1.20 | 1.11,<br>0.82-1.49 | 1.00,<br>0.85-1.18 | 0.84,<br>0.76-0.95 | 1.09,<br>0.98-1.21 | 0.83,<br>0.72-0.95 | 1.09,<br>0.97-1.22 | 1.30,<br>0.85-1.99 | 0.96,<br>0.60-1.55 |
| Organ meat     | 0.91,<br>0.78-1.07 | 1.01,<br>0.92-1.12 | 0.97,<br>0.79-1.20 | 1.00,<br>0.88-1.13 | 0.81,<br>0.58-1.11 | 1.11,<br>0.91-1.34 | 1.03,<br>0.91-1.16 | 0.90,<br>0.79-1.01 | 1.04,<br>0.91-1.18 | 0.89,<br>0.79-1.02 | 0.84,<br>0.51-1.38 | 0.87,<br>0.52-1.45 |
| White meat     | 1.02,<br>0.88-1.17 | 0.94,<br>0.85-1.03 | 0.96,<br>0.80-1.15 | 0.95,<br>0.84-1.07 | 1.27,<br>0.92-1.77 | 0.86,<br>0.72-1.03 | 0.97,<br>0.87-1.08 | 0.95,<br>0.85-1.06 | 1.01,<br>0.89-1.14 | 0.94,<br>0.84-1.06 | 0.88,<br>0.56-1.41 | 0.69,<br>0.43-1.13 |
| Total red meat | 1.05,<br>0.91-1.22 | 1.09,<br>1.00-1.20 | 1.08,<br>0.89-1.32 | 1.10,<br>0.98-1.24 | 1.09,<br>0.80-1.50 | 1.15,<br>0.97-1.38 | 1.04,<br>0.93-1.17 | 0.99,<br>0.89-1.10 | 1.02,<br>0.90-1.15 | 1.01,<br>0.90-1.14 | 1.45,<br>0.89-2.46 | 1.15,<br>0.72-1.83 |

HR are adjusted for the selected confounders as described in Supplementary Table 1; they indicate the risk for an increase of one quintile of meat intake

GC, gastric cancer; CGC, cardia gastric cancer; NCGC, non-cardia gastric cancer; EC, esophageal cancer; ESCC, esophageal squamous cell carcinoma; EAC, esophageal adenocarcinoma

Supplementary figure 1. Hazard ratio for increase in one quintile of meat intake by subtype of esophageal and gastric cancer.

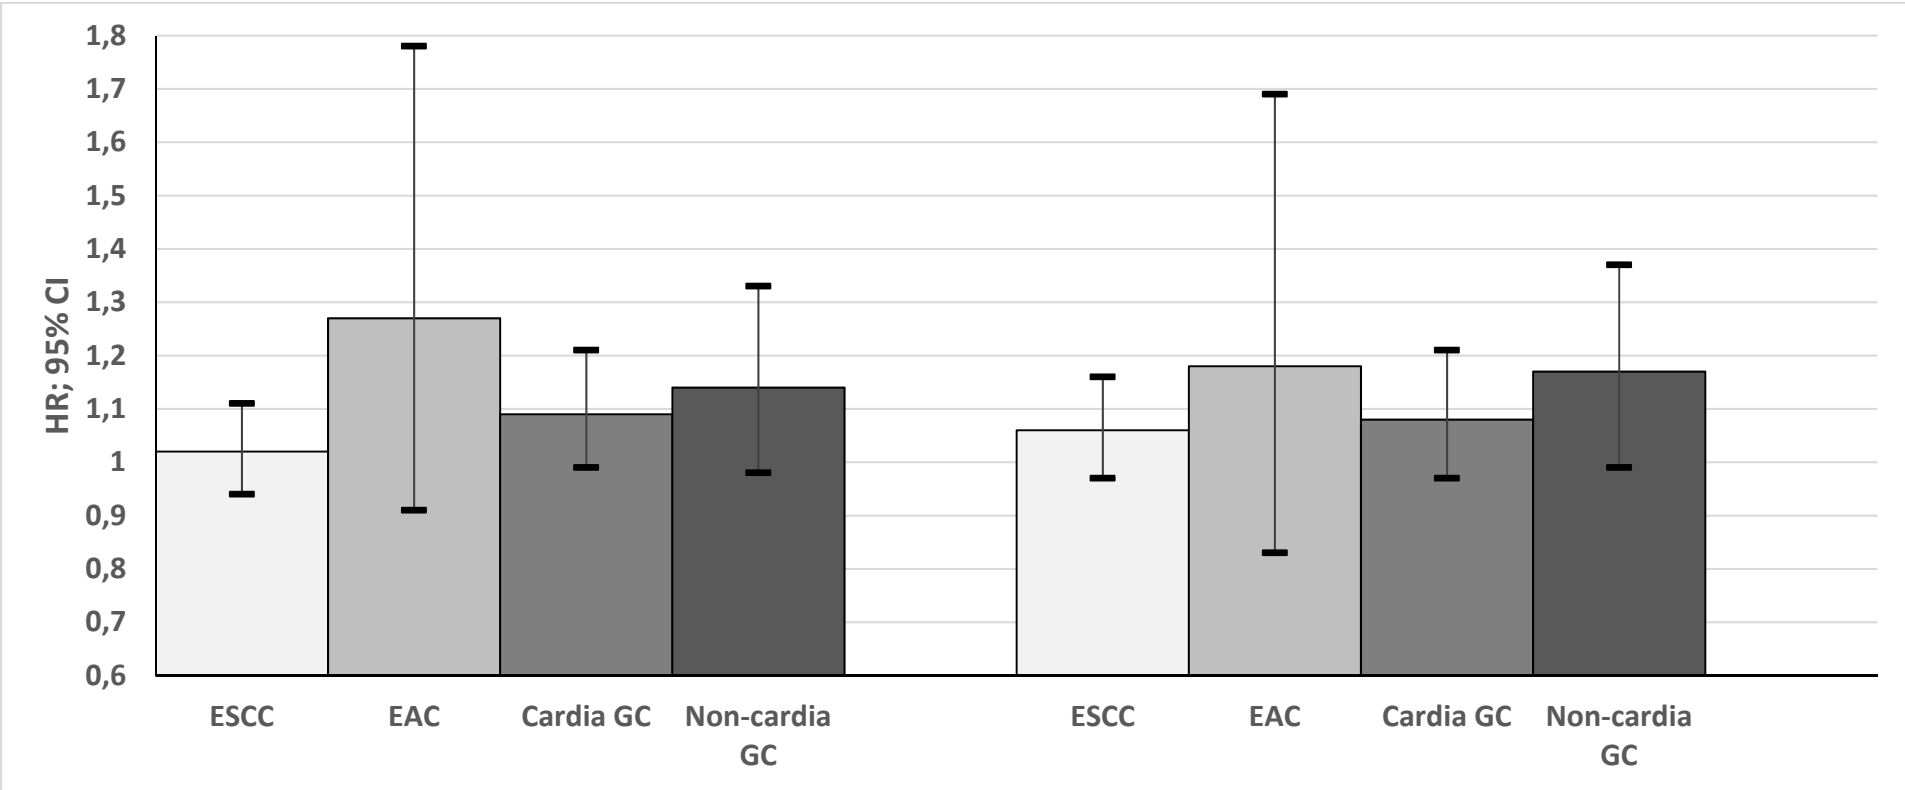

**Total red meat**

**Unprocessed red meat**
